# Supplementary material
Source: PubMed Central journal article supplement (PMC3364739)
Supplement: emboj201286s2.pdf [file emboj201286s2.pdf]

| Accession Number               | Protein Description                                                            |
|--------------------------------|--------------------------------------------------------------------------------|
| gi 61744475 ref NP_001012679.1 | 4F2 cell-surface antigen heavy chain isoform a [Homo sapiens]                  |
| gi 31542947 ref NP_002147.2    | 60 kDa heat shock protein, mitochondrial [Homo sapiens]                        |
| gi 4506597 ref NP_000967.1     | 60S ribosomal protein L12 [Homo sapiens]                                       |
| gi 4506597 ref NP_000967.1     | 60S ribosomal protein L12 [Homo sapiens]                                       |
| gi 47271406 ref NP_062552.2    | 7SK snRNA methylphosphate capping enzyme isoform A [Homo sapiens]              |
| gi 47271406 ref NP_062552.2    | 7SK snRNA methylphosphate capping enzyme isoform A [Homo sapiens]              |
| gi 4502015 ref NP_003479.1     | A-kinase anchor protein 1, mitochondrial precursor [Homo sapiens]              |
| gi 4502015 ref NP_003479.1     | A-kinase anchor protein 1, mitochondrial precursor [Homo sapiens]              |
| gi 301171467 ref NP_001180345  | ATP-dependent RNA helicase DDX3X isoform 2 [Homo sapiens]                      |
| gi 46255026 ref NP_057205.2    | BTB/POZ domain-containing protein KCTD3 [Homo sapiens]                         |
| gi 17978489 ref NP_001775.2    | CD97 antigen isoform 2 precursor [Homo sapiens]                                |
| gi 14150015 ref NP_115675.1    | DCN1-like protein 5 [Homo sapiens]                                             |
| gi 4504191 ref NP_000170.1     | DNA mismatch repair protein Msh6 [Homo sapiens]                                |
| gi 4504191 ref NP_000170.1     | DNA mismatch repair protein Msh6 [Homo sapiens]                                |
| gi 61676188 ref NP_113584.3    | E3 ubiquitin-protein ligase HUWE1 [Homo sapiens]                               |
| gi 21361472 ref NP_056092.2    | E3 ubiquitin-protein ligase NEDD4-like isoform 3 [Homo sapiens]                |
| gi 256818821 ref NP_064550.3   | E3 ubiquitin-protein ligase RAD18 [Homo sapiens]                               |
| gi 33620716 ref NP_061173.1    | E3 ubiquitin-protein ligase RBBP6 isoform 2 [Homo sapiens]                     |
| gi 33620716 ref NP_061173.1    | E3 ubiquitin-protein ligase RBBP6 isoform 2 [Homo sapiens]                     |
| gi 226371723 ref NP_620137.2   | FCH domain only protein 2 isoform a [Homo sapiens]                             |
| gi 50962882 ref NP_001002909.1 | G patch domain-containing protein 8 [Homo sapiens]                             |
| gi 4504063 ref NP_002068.1     | Golgin subfamily A member 1 [Homo sapiens]                                     |
| gi 289577134 ref NP_001166184  | Golgin subfamily A member 4 isoform 1 [Homo sapiens]                           |
| gi 6715600 ref NP_002069.2     | Golgin subfamily A member 4 isoform 2 [Homo sapiens]                           |
| gi 21396500 ref NP_003600.2    | HIRA-interacting protein 3 [Homo sapiens]                                      |
| gi 21396500 ref NP_003600.2    | HIRA-interacting protein 3 [Homo sapiens]                                      |
| gi 21396500 ref NP_003600.2    | HIRA-interacting protein 3 [Homo sapiens]                                      |
| gi 21361437 ref NP_055315.2    | HIV Tat-specific factor 1 [Homo sapiens]                                       |
| gi 21361437 ref NP_055315.2    | HIV Tat-specific factor 1 [Homo sapiens]                                       |
| gi 8923427 ref NP_060300.1     | OCIA domain-containing protein 1 isoform 1 [Homo sapiens]                      |
| gi 221139764 ref NP_065952.2   | PHD and RING finger domain-containing protein 1 [Homo sapiens]                 |
| gi 20127479 ref NP_005667.2    | RNA-binding protein 10 isoform 1 [Homo sapiens]                                |
| gi 117676384 ref NP_004710.2   | SRSF2-interacting protein [Homo sapiens]                                       |
| gi 117676384 ref NP_004710.2   | SRSF2-interacting protein [Homo sapiens]                                       |
| gi 117676384 ref NP_004710.2   | SRSF2-interacting protein [Homo sapiens]                                       |
| gi 54124343 ref NP_001005751.1 | WASH complex subunit FAM21A [Homo sapiens]                                     |
| gi 31657094 ref NP_061155.2    | actin-binding protein anillin [Homo sapiens]                                   |
| gi 20127553 ref NP_057321.2    | anaphase-promoting complex subunit 5 isoform a [Homo sapiens]                  |
| gi 156071474 ref NP_003031.3   | anion exchange protein 2 [Homo sapiens]                                        |
| gi 109150425 ref NP_060559.2   | ankyrin repeat and zinc finger domain-containing protein 1 [Homo sapiens]      |
| gi 134152708 ref NP_060481.3   | arginine and glutamate-rich protein 1 [Homo sapiens]                           |
| gi 13129094 ref NP_076998.1    | ashwin [Homo sapiens]                                                          |
| gi 171543895 ref NP_002964.3   | ataxin-2 [Homo sapiens]                                                        |
| gi 167830411 ref NP_000897.3   | atrial natriuretic peptide receptor 1 precursor [Homo sapiens]                 |
| gi 4503579 ref NP_001422.1     | band 4.1-like protein 2 isoform a [Homo sapiens]                               |
| gi 30795231 ref NP_006308.3    | brain acid soluble protein 1 [Homo sapiens]                                    |
| gi 19718731 ref NP_490597.1    | bromodomain-containing protein 4 isoform long [Homo sapiens]                   |
| gi 21361331 ref NP_001866.2    | carbamoyl-phosphate synthase [ammonia], mitochondrial isoform 1 [Homo sapiens] |
| gi 10835010 ref NP_001322.1    | catenin delta-1 isoform 1B [Homo sapiens]                                      |
| gi 23238226 ref NP_689449.1    | cdc42 effector protein 1 [Homo sapiens]                                        |
| gi 11067747 ref NP_001244.1    | cell division cycle 5-like protein [Homo sapiens]                              |

gi|11067747|ref|NP\_001244.1| cell division cycle 5-like protein [Homo sapiens]  
gi|157817073|ref|NP\_055898.1|; cell division protein kinase 12 isoform 2 [Homo sapiens]; cell divis  
gi|157817073|ref|NP\_055898.1|; cell division protein kinase 12 isoform 2 [Homo sapiens]; cell divis  
gi|145309300|ref|NP\_112557.2| cell division protein kinase 13 isoform 2 [Homo sapiens]  
gi|145309300|ref|NP\_112557.2| cell division protein kinase 13 isoform 2 [Homo sapiens]  
gi|145309300|ref|NP\_112557.2| cell division protein kinase 13 isoform 2 [Homo sapiens]  
gi|145309300|ref|NP\_112557.2| cell division protein kinase 13 isoform 2 [Homo sapiens]  
gi|71274107|ref|NP\_006491.2| cell surface glycoprotein MUC18 [Homo sapiens]  
gi|51599156|ref|NP\_001264.2| chromodomain-helicase-DNA-binding protein 4 [Homo sapiens]  
gi|122937392|ref|NP\_001074012| chromosome 19 open reading frame 29 [Homo sapiens]  
gi|150417989|ref|NP\_001092872| cyclin-K [Homo sapiens]  
gi|7657683|ref|NP\_055146.1| cystine/glutamate transporter [Homo sapiens]  
gi|23943920|ref|NP\_077734.1| cytosolic phospholipase A2 [Homo sapiens]  
gi|21361368|ref|NP\_002851.2| delta-1-pyrroline-5-carboxylate synthase isoform 1 [Homo sapien  
gi|21361368|ref|NP\_002851.2| delta-1-pyrroline-5-carboxylate synthase isoform 1 [Homo sapien  
gi|116534898|ref|NP\_001934.2| desmoglein-2 preproprotein [Homo sapiens]  
gi|58530840|ref|NP\_004406.2| desmoplakin isoform I [Homo sapiens]  
gi|19115954|ref|NP\_001360.1| dynein heavy chain 5, axonemal [Homo sapiens]  
gi|7706687|ref|NP\_057421.1| ena/VASP-like protein [Homo sapiens]  
gi|29725609|ref|NP\_005219.2| epidermal growth factor receptor isoform a precursor [Homo sap  
gi|29725609|ref|NP\_005219.2| epidermal growth factor receptor isoform a precursor [Homo sap  
gi|29725609|ref|NP\_005219.2| epidermal growth factor receptor isoform a precursor [Homo sap  
gi|41350201|ref|NP\_037465.2| epsin-1 isoform c [Homo sapiens]  
gi|45387945|ref|NP\_065779.1| extended synaptotagmin-2 [Homo sapiens]  
gi|45387945|ref|NP\_065779.1| extended synaptotagmin-2 [Homo sapiens]  
gi|118918395|ref|NP\_001073141| fibronectin type-III domain-containing protein 3A isoform 1 [Hom  
gi|118918395|ref|NP\_001073141| fibronectin type-III domain-containing protein 3A isoform 1 [Hom  
gi|281182404|ref|NP\_060830.2| gamma-taxilin isoform 1 [Homo sapiens]  
gi|281182404|ref|NP\_060830.2| gamma-taxilin isoform 1 [Homo sapiens]  
gi|67782311|ref|NP\_008860.4| helicase SKI2W [Homo sapiens]  
gi|42741655|ref|NP\_000236.2| hepatocyte growth factor receptor isoform b precursor [Homo sa  
gi|14249158|ref|NP\_116020.1| hepatoma-derived growth factor-related protein 2 isoform 2 [Hoi  
gi|197313748|ref|NP\_054878.5| histone-lysine N-methyltransferase SETD2 [Homo sapiens]  
gi|197313748|ref|NP\_054878.5| histone-lysine N-methyltransferase SETD2 [Homo sapiens]  
gi|149363685|ref|NP\_056140.1| hypothetical protein LOC23379 [Homo sapiens]  
gi|145977194|ref|NP\_001078844| hypothetical protein LOC400793 isoform 2 [Homo sapiens]  
gi|54607035|ref|NP\_000204.3| integrin beta-4 isoform 1 precursor [Homo sapiens]  
gi|8393638|ref|NP\_058642.1| junctional adhesion molecule A precursor [Homo sapiens]  
gi|8393638|ref|NP\_058642.1| junctional adhesion molecule A precursor [Homo sapiens]  
gi|21735575|ref|NP\_065698.1| junctophilin-1 [Homo sapiens]  
gi|21735575|ref|NP\_065698.1| junctophilin-1 [Homo sapiens]  
gi|55741641|ref|NP\_065789.1| kinase D-interacting substrate of 220 kDa [Homo sapiens]  
gi|223890147|ref|NP\_001138787| kinetochore-associated protein DSN1 homolog isoform 1 [Homo :  
gi|223890147|ref|NP\_001138787| kinetochore-associated protein DSN1 homolog isoform 1 [Homo :  
gi|39725634|ref|NP\_056130.2| la-related protein 1 isoform 1 [Homo sapiens]  
gi|27363458|ref|NP\_076941.2| leucine-rich repeat and fibronectin type-III domain-containing pro  
gi|4758332|ref|NP\_004449.1|; gi long-chain-fatty-acid--CoA ligase 4 isoform 1 [Homo sapiens]; lon  
gi|258614003|ref|NP\_001158243| low affinity cationic amino acid transporter 2 isoform 3 [Homo sa  
gi|291621647|ref|NP\_006311.2| membrane-associated progesterone receptor component 2 [Horr

gi|94681046|ref|NP\_064569.3| metal transporter CNNM4 [Homo sapiens]  
gi|33188445|ref|NP\_036222.3| microtubule-actin cross-linking factor 1 isoform a [Homo sapiens]  
gi|197276600|ref|NP\_001127836| microtubule-associated protein 4 isoform 4 [Homo sapiens]  
gi|45120119|ref|NP\_055790.1| microtubule-associated serine/threonine-protein kinase 1 [Homo sapiens]  
gi|29789409|ref|NP\_777549.1| mimitin, mitochondrial [Homo sapiens]  
gi|4759112|ref|NP\_004198.1| monocarboxylate transporter 4 [Homo sapiens]  
gi|134142335|ref|NP\_063955.2| multidrug resistance-associated protein 1 isoform 5 [Homo sapiens]  
gi|4506357|ref|NP\_003944.1| myelin protein zero-like protein 1 isoform a [Homo sapiens]  
gi|7305053|ref|NP\_038479.1| myoferlin isoform a [Homo sapiens]  
gi|61743954|ref|NP\_001611.1| neuroblast differentiation-associated protein AHNAK isoform 1 [Homo sapiens]  
gi|61743954|ref|NP\_001611.1| neuroblast differentiation-associated protein AHNAK isoform 1 [Homo sapiens]  
gi|5032093|ref|NP\_005619.1| neutral amino acid transporter B(0) isoform 1 [Homo sapiens]  
gi|33356172|ref|NP\_002476.2| nibrin [Homo sapiens]  
gi|24430146|ref|NP\_005115.2| nuclear pore complex protein Nup153 [Homo sapiens]  
gi|22538461|ref|NP\_006302.2| nuclear receptor corepressor 1 isoform 1 [Homo sapiens]  
gi|116256445|ref|NP\_001070729| nuclear receptor corepressor 2 isoform 2 [Homo sapiens]  
gi|55956788|ref|NP\_005372.2| nucleolin [Homo sapiens]  
gi|114155142|ref|NP\_003283.2| nucleoprotein TPR [Homo sapiens]  
gi|33354281|ref|NP\_877499.1| orphan sodium- and chloride-dependent neurotransmitter transporter 1 isoform a [Homo sapiens]  
gi|33354281|ref|NP\_877499.1| orphan sodium- and chloride-dependent neurotransmitter transporter 1 isoform a [Homo sapiens]  
gi|14149704|ref|NP\_056365.1| oxysterol-binding protein-related protein 3 isoform a [Homo sapiens]  
gi|14149704|ref|NP\_056365.1| oxysterol-binding protein-related protein 3 isoform a [Homo sapiens]  
gi|14149704|ref|NP\_056365.1| oxysterol-binding protein-related protein 3 isoform a [Homo sapiens]  
gi|14149704|ref|NP\_056365.1| oxysterol-binding protein-related protein 3 isoform a [Homo sapiens]  
gi|157743252|ref|NP\_115599.2| pecanex-like protein 3 [Homo sapiens]  
gi|115430209|ref|NP\_076412.3| phosphatase and actin regulator 4 isoform 2 [Homo sapiens]  
gi|13559514|ref|NP\_060895.1| phosphatidylinositol 4-kinase type 2-alpha [Homo sapiens]  
gi|6005830|ref|NP\_009114.1| plakophilin-3 [Homo sapiens]  
gi|48255945|ref|NP\_001673.2| plasma membrane calcium-transporting ATPase 1 isoform 1b [Homo sapiens]  
gi|4505611|ref|NP\_002573.1| poly(A)-specific ribonuclease PARN isoform 1 [Homo sapiens]  
gi|7661672|ref|NP\_056399.1| polymerase delta-interacting protein 2 [Homo sapiens]  
gi|40254978|ref|NP\_112179.2| pre-mRNA 3'-end-processing factor FIP1 isoform 1 [Homo sapiens]  
gi|33620745|ref|NP\_056969.2| pre-mRNA cleavage complex 2 protein Pcf11 [Homo sapiens]  
gi|27436946|ref|NP\_733821.1| prelamin-A/C isoform 1 precursor [Homo sapiens]  
gi|291190787|ref|NP\_055872.4| probable E3 ubiquitin-protein ligase MYCBP2 [Homo sapiens]  
gi|148839292|ref|NP\_078800.3| probable cation-transporting ATPase 13A3 [Homo sapiens]  
gi|187761317|ref|NP\_001120680| probable methylcytosine dioxygenase TET2 isoform a [Homo sapiens]  
gi|41152072|ref|NP\_056272.2| probable palmitoyltransferase ZDHHC5 [Homo sapiens]  
gi|41152072|ref|NP\_056272.2| probable palmitoyltransferase ZDHHC5 [Homo sapiens]  
gi|153792074|ref|NP\_065770.1| proline-rich protein 12 [Homo sapiens]  
gi|115298682|ref|NP\_055987.2| protein BAT2-like 2 [Homo sapiens]  
gi|115298682|ref|NP\_055987.2| protein BAT2-like 2 [Homo sapiens]  
gi|262359929|ref|NP\_056261.4| protein ELYS [Homo sapiens]  
gi|13654270|ref|NP\_112483.1| protein LAS1 homolog isoform 1 [Homo sapiens]  
gi|223555917|ref|NP\_848927.2| protein LYRIC [Homo sapiens]  
gi|209862789|ref|NP\_056056.2| protein MICAL-3 isoform 1 [Homo sapiens]  
gi|45827729|ref|NP\_056171.2| protein scribble homolog isoform b [Homo sapiens]  
gi|4505685|ref|NP\_000275.1| pyruvate dehydrogenase E1 component subunit alpha, somatic form [Homo sapiens]  
gi|34147513|ref|NP\_004628.4| ras-related protein Rab-7a [Homo sapiens]  
gi|4759012|ref|NP\_004242.1| ras-related protein Rab-9A [Homo sapiens]  
gi|183396804|ref|NP\_056018.2| regulation of nuclear pre-mRNA domain-containing protein 2 [Homo sapiens]  
gi|24431933|ref|NP\_722550.1| reticulon-4 isoform B [Homo sapiens]

gi|54860079|ref|NP\_001006635.1| rho GTPase-activating protein 17 isoform 1 [Homo sapiens]  
gi|8923579|ref|NP\_060377.1| rhoA activator C11orf59 [Homo sapiens]  
gi|4502285|ref|NP\_001672.1| sarcoplasmic/endoplasmic reticulum calcium ATPase 2 isoform 2  
gi|4505571|ref|NP\_003891.1| sequestosome-1 isoform 1 [Homo sapiens]  
gi|42542379|ref|NP\_005830.2| serine/arginine repetitive matrix protein 1 [Homo sapiens]  
gi|42542379|ref|NP\_005830.2| serine/arginine repetitive matrix protein 1 [Homo sapiens]  
gi|118572613|ref|NP\_057417.3| serine/arginine repetitive matrix protein 2 [Homo sapiens]  
gi|4759100|ref|NP\_004759.1| serine/arginine-rich splicing factor 11 isoform 1 [Homo sapiens]  
gi|20127499|ref|NP\_006266.2| serine/arginine-rich splicing factor 6 [Homo sapiens]  
gi|20127499|ref|NP\_006266.2| serine/arginine-rich splicing factor 6 [Homo sapiens]  
gi|166295192|ref|NP\_001265.2| serine/threonine-protein kinase Chk1 [Homo sapiens]  
gi|89276756|ref|NP\_003904.3| serine/threonine-protein kinase PRP4 homolog [Homo sapiens]  
gi|58331218|ref|NP\_056992.4| serrate RNA effector molecule homolog isoform a [Homo sapiens]  
gi|134288865|ref|NP\_003606.3| sodium bicarbonate cotransporter 3 [Homo sapiens]  
gi|117168275|ref|NP\_109599.3| sodium-coupled neutral amino acid transporter 1 [Homo sapiens]  
gi|27777632|ref|NP\_003038.2| sodium/hydrogen exchanger 1 [Homo sapiens]  
gi|40316845|ref|NP\_005107.4| solute carrier family 23 member 2 [Homo sapiens]  
gi|39777594|ref|NP\_057438.3| solute carrier organic anion transporter family member 4A1 [Homo sapiens]  
gi|154759259|ref|NP\_003118.2| spectrin alpha chain, brain isoform 2 [Homo sapiens]  
gi|28557788|ref|NP\_006742.2| sperm-specific antigen 2 isoform 2 [Homo sapiens]  
gi|154146193|ref|NP\_116259.2| splicing factor, arginine/serine-rich 18 [Homo sapiens]  
gi|226509740|ref|NP\_067051.2| splicing factor, arginine/serine-rich 19 [Homo sapiens]  
gi|170932494|ref|NP\_003560.2| syntaxin-7 [Homo sapiens]  
gi|38679909|ref|NP\_060939.3| testis-expressed sequence 2 protein [Homo sapiens]  
gi|38679909|ref|NP\_060939.3| testis-expressed sequence 2 protein [Homo sapiens]  
gi|4507555|ref|NP\_003267.1|; gi| thymopoietin isoform alpha [Homo sapiens]; thymopoietin isoform  
gi|167234419|ref|NP\_005110.2| thyroid hormone receptor-associated protein 3 [Homo sapiens]  
gi|167234419|ref|NP\_005110.2| thyroid hormone receptor-associated protein 3 [Homo sapiens]  
gi|291045225|ref|NP\_596869.4| titin isoform N2-A [Homo sapiens]  
gi|47419909|ref|NP\_003843.3| transcription intermediary factor 1-alpha isoform b [Homo sapiens]  
gi|5032179|ref|NP\_005753.1| transcription intermediary factor 1-beta [Homo sapiens]  
gi|189458817|ref|NP\_003225.2| transferrin receptor protein 1 [Homo sapiens]  
gi|9558733|ref|NP\_037425.1| transformer-2 protein homolog alpha [Homo sapiens]  
gi|6005942|ref|NP\_009057.1| transitional endoplasmic reticulum ATPase [Homo sapiens]  
gi|262399371|ref|NP\_001124396| transmembrane protein 201 isoform 1 [Homo sapiens]  
gi|5032189|ref|NP\_005648.1| tumor suppressor p53-binding protein 1 isoform 3 [Homo sapiens]  
gi|5032189|ref|NP\_005648.1| tumor suppressor p53-binding protein 1 isoform 3 [Homo sapiens]  
gi|37577122|ref|NP\_057105.2| ubiquitin-conjugating enzyme E2 J1 [Homo sapiens]  
gi|94429050|ref|NP\_004883.2| vesicle-trafficking protein SEC22b [Homo sapiens]  
gi|62414289|ref|NP\_003371.2| vimentin [Homo sapiens]

gi|62414289|ref|NP\_003371.2| vimentin [Homo sapiens]  
gi|62414289|ref|NP\_003371.2| vimentin [Homo sapiens]  
gi|62414289|ref|NP\_003371.2| vimentin [Homo sapiens]  
gi|224994203|ref|NP\_005996.2| wolframin [Homo sapiens]  
gi|116008442|ref|NP\_055885.3| zinc finger CCCH domain-containing protein 13 [Homo sapiens]  
gi|116008442|ref|NP\_055885.3| zinc finger CCCH domain-containing protein 13 [Homo sapiens]  
gi|27477136|ref|NP\_064504.2| zinc finger CCCH-type antiviral protein 1 isoform 1 [Homo sapiens]  
gi|27477136|ref|NP\_064504.2| zinc finger CCCH-type antiviral protein 1 isoform 1 [Homo sapiens]

| Peptide Sequence      | Variable Modification: Protein-Relative Modification |                              |
|-----------------------|------------------------------------------------------|------------------------------|
| FTGLSK                | S5: Phospho                                          | S196: Phospho                |
| TVIIQSWGSPK           | S7: Phospho                                          | S67: Phospho                 |
| ELSGTIK               | T5: Phospho                                          | T128: Phospho                |
| IGPLGLSPK             | S7: Phospho                                          | S38: Phospho                 |
| CAPSAGSPAAAVGR        | S4: Phospho                                          | S57: Phospho                 |
| ESPGAAATSSSGPQAQHR    | S2: Phospho                                          | S69: Phospho                 |
| SESSGILPNTTDMR        | S3: Phospho                                          | S107: Phospho                |
| LLSSPTK               | S5: Phospho                                          | S445: Phospho                |
| FSGGFGAR              | S2: Phospho                                          | S593: Phospho                |
| LLDQCDSLTSR           | T9: Phospho                                          | T603: Phospho                |
| YSEFTSTTSGTGHNQTR     | S9: Phospho                                          | S725: Phospho                |
| LISGEEHFSSK           | S3: Phospho                                          | S41: Phospho                 |
| VHVQFFDSDPTR          | S9: Phospho                                          | S137: Phospho                |
| VHVQFFDSDPTR          | T11: Phospho                                         | T139: Phospho                |
| LGSSGLGSASSIQAAVR     | S4: Phospho                                          | S3753: Phospho               |
| TSPQELSEELSR          | S2: Phospho                                          | S303: Phospho                |
| NHLLQFALESPAK         | S10: Phospho                                         | S99: Phospho                 |
| LEVTEIVKPSPK          | S10: Phospho                                         | S1145: Phospho               |
| LSSDLTR               | S3: Phospho                                          | S1592: Phospho               |
| NLSNEELTK             | S3: Phospho                                          | S403: Phospho                |
| SQSPHYFR              | S3: Phospho                                          | S1035: Phospho               |
| GSIRPSISNPR           | S8: Phospho                                          | S760: Phospho                |
| TSSFTEQLDEGTPNR       | S3: Phospho                                          | S41: Phospho                 |
| VPSVESLFR             | S3: Phospho                                          | S71: Phospho                 |
| EVSDSEAGGGPQGER       | S3: Phospho                                          | S370: Phospho                |
| EVSDSEAGGGPQGER       | S5: Phospho                                          | S372: Phospho                |
| TLDSDEERPRPAPPDWSHMR  | S4: Phospho                                          | S530: Phospho                |
| HFSEHPSTSK            | S9: Phospho                                          | S409: Phospho                |
| HFSEHPSTSK            | T8: Phospho                                          | T408: Phospho                |
| LENSPLGEALR           | S4: Phospho                                          | S108: Phospho                |
| ECSPTSSLER            | S3: Phospho                                          | S1123: Phospho               |
| LASDDRPSPPR           | S8: Phospho                                          | S723: Phospho                |
| FHSPSTTWSPNK          | S3: Phospho                                          | S796: Phospho                |
| FHSPSTTWSPNK          | S5: Phospho                                          | S798: Phospho                |
| FHSPSTTWSPNK          | T7: Phospho                                          | T800: Phospho                |
| SRPTSFADLAAR          | S1: Phospho; S5: Phospho                             | S284: Phospho; S288: Phospho |
| QPLSEASNQQPLSGGEEK    | S13: Phospho                                         | S54: Phospho                 |
| EELDVSVR              | S6: Phospho                                          | S195: Phospho                |
| TSPSSPAPLPHQEATPR     | S5: Phospho                                          | S173: Phospho                |
| LHSPQTHWK             | S3: Phospho                                          | S361: Phospho                |
| LSFSLK                | S2: Phospho                                          | S266: Phospho                |
| SPPLSPVGTTPVK         | S1: Phospho                                          | S189: Phospho                |
| TSPSGGTWSSVSGVPR      | T7: Phospho                                          | T672: Phospho                |
| ENSSNILDNLLSR         | S3: Phospho                                          | S809: Phospho                |
| EISPGSGPGEIR          | S6: Phospho                                          | S718: Phospho                |
| SDGAPASDSKPGSSEAAPSSK | S1: Phospho                                          | S164: Phospho                |
| IHSPIIR               | S3: Phospho                                          | S1117: Phospho               |
| EWPSNLDLR             | S4: Phospho                                          | S835: Phospho                |
| GSLASLDSLR            | S5: Phospho                                          | S349: Phospho                |
| SDSLLSFR              | S3: Phospho                                          | S192: Phospho                |
| LVLPAQISDAELQEVVK     | S9: Phospho                                          | S303: Phospho                |

SGTTPKPVINSTPGR  
SSSPFLSK  
SSSPFLSK  
HSSISPSTLTLK  
ILELTPEPDRPR  
SLSPLGGR  
SPYSPVLR  
SELVVEVK  
SAIDLTPIVVEDK  
SWSPSSASSASPGR  
AVVVSPK  
LPSLGNK  
CSVLSNVEAR  
CSVLSNVEAR  
CSVLSNVEAR  
VLGVSGSQSR  
LGSVVTR  
LSLSTSK  
VVPSFLPVDQGGSLVGR  
SMSFQGIR  
NTLEAIR  
SNSVEKPVSSILSR  
ELVEPLTPSGEAPNQALLR  
MHLPSPTDSNFYR  
TPLLSLSATSNNSTVACIDR  
TALPTSGSSAGELELLAGEVPAR  
SSSLLASPGHISVK  
SSSLLASPGHISVK  
MSSPPSSPQK  
WGEGTPK  
NLVSPAYCTQESR  
NLVSPAYCTQESR  
ASSLEDLVLK  
DLGSELVR  
SEGFMDR  
CCSPPNELGFR  
LNDSPTLK  
TLSTSTLR  
LSLSPISLAESWEDGSPPPQAR  
LLELQEVDSLLR  
QTSSFLV  
VIYSQPSAR  
ESPHFYR  
TSLASLR  
TPSTVTLNNSAPANR  
IHLGSSPK  
IHLGSSPK  
SLPTTVPESPNYR  
SCSLDLGDAGCYGYAR  
LSPEPWPETGLVTDFAK  
NLSSPFIFHEK  
DFSLEQLR

T4: Phospho  
S1: Phospho  
S3: Phospho  
S2: Phospho; S5: Phospho  
T5: Phospho  
S1: Phospho; S3: Phospho  
S1: Phospho; S4: Phospho  
S1: Phospho  
T6: Phospho  
S13: Phospho  
S5: Phospho  
S3: Phospho  
S2: Phospho  
S2: Phospho; S4: Phospho  
S4: Phospho  
S7: Phospho  
S3: Phospho  
S4: Phospho  
S13: Phospho  
S3: Phospho  
T2: Phospho  
S3: Phospho  
T7: Phospho  
S5: Phospho  
S6: Phospho  
S8: Phospho  
S1: Phospho  
S3: Phospho; S4: Phospho  
S3: Phospho  
T5: Phospho  
S12: Phospho  
S4: Phospho  
S3: Phospho  
S4: Phospho  
S1: Phospho  
S3: Phospho  
S4: Phospho  
S3: Phospho  
S16: Phospho  
S9: Phospho  
S3: Phospho  
S7: Phospho  
S2: Phospho  
S5: Phospho  
S3: Phospho  
S5: Phospho  
S6: Phospho  
S9: Phospho  
S3: Phospho  
T7: Phospho  
S3: Phospho; S4: Phospho  
S3: Phospho  
T430: Phospho  
S332: Phospho  
S334: Phospho  
S436: Phospho; S439: Phospho  
T1186: Phospho  
S315: Phospho; S317: Phospho  
S397: Phospho; S400: Phospho  
S606: Phospho  
T1653: Phospho  
S120: Phospho  
S340: Phospho  
S26: Phospho  
S727: Phospho  
S727: Phospho; S729: Phospho  
S729: Phospho  
S410: Phospho  
S79: Phospho  
S429: Phospho  
S680: Phospho  
S2209: Phospho  
T977: Phospho  
S333: Phospho  
T693: Phospho  
S991: Phospho  
S1037: Phospho  
S393: Phospho  
S708: Phospho  
S710: Phospho; S711: Phospho  
S203: Phospho  
T975: Phospho  
S105: Phospho  
S97: Phospho  
S256: Phospho  
S966: Phospho  
S454: Phospho  
S532: Phospho  
S624: Phospho  
S1838: Phospho  
S249: Phospho  
S1069: Phospho  
S295: Phospho  
S284: Phospho  
S452: Phospho  
S165: Phospho  
S1681: Phospho  
S57: Phospho  
S58: Phospho  
S697: Phospho  
S585: Phospho  
T638: Phospho  
S686: Phospho; S687: Phospho  
S128: Phospho

SASLSYPDR  
MLSSSDAITQEFMDLR  
DVTPPPETEVLK  
SSLFR  
GHASAPYFGK  
LHKPPADSGVDLR  
QLSSSSSYSGDISR  
SESVVYADIR  
SLGPPGPPFNITPR  
LQGGVSLASK  
VSVGAPDLSLEASEGSIK  
SELPLDPLPVPTTEGNPLK  
NHAVLTANFSVTNLSQTDEIPVLT  
NTSLPPLWSPEAER  
VSPENLVDK  
ANASPQKPLDLK  
VVVSPTK  
AADSQNSGEGNTGAAESSFSQEVSR  
IPSEMPSPNFGK  
QSGSPTLDTAPNGR  
IHAESLLDSPAVALK  
LHSSNPNLSTLDFGEEK  
LHSSNPNLSTLDFGEEK  
LHSSNPNLSTLDFGEEK  
WSLGGR  
SSSPVQVEEPPVR  
VAAAAGSGPSPGSPGHDR  
LSSGFDDIDLPSAVK  
SSIHNFMTHPFR  
NNSFTAPSTVGK  
IFLSGTLETVR  
DHSPTPSVFNSDEER  
SPIIHSPK  
SVGGSGGSGFDNLVTR  
VNSGDTEVGSSLLR  
LVHDSLEDLQMTR  
VSPDFTQESR  
SFHFDPLSSGSR  
TIVIRPPFLRPEVSDGQITVK  
HPPLYQAGLTPPLSPPK  
LPDLSPVENK  
SESSDFEVVVK  
ISFVEEDVHPK  
MEVGPFGSTGQESPTAENAR  
WNSVSPASAGK  
SSLFSPR  
NSLESISSDR  
YHGHSMSDPGVSRY  
FQSLGVAFYR  
SDHLIQTDTVNLHR  
ASIGQSPGLPSTTFK  
GSSGVSVDLLYWR

S3: Phospho  
S3: Phospho  
T8: Phospho  
S2: Phospho  
S4: Phospho  
S8: Phospho  
S3: Phospho; S4: Phospho  
S3: Phospho  
T12: Phospho  
S4: Phospho  
S16: Phospho  
S1: Phospho  
T17: Phospho  
S3: Phospho  
S2: Phospho  
S4: Phospho  
S4: Phospho  
S7: Phospho  
S7: Phospho  
S4: Phospho  
S10: Phospho  
S3: Phospho  
S4: Phospho  
T10: Phospho  
S2: Phospho  
S3: Phospho  
S10: Phospho; S14: Phospho  
S3: Phospho  
S2: Phospho  
S3: Phospho  
T7: Phospho  
S11: Phospho  
S1: Phospho; S6: Phospho  
S5: Phospho  
S3: Phospho  
S5: Phospho  
S2: Phospho  
S11: Phospho  
T1: Phospho  
S14: Phospho  
S5: Phospho  
S4: Phospho  
S2: Phospho  
S12: Phospho  
S3: Phospho  
S5: Phospho  
S7: Phospho  
S5: Phospho  
S3: Phospho  
S1: Phospho  
S6: Phospho  
S3: Phospho  
S664: Phospho  
S1376: Phospho  
T526: Phospho  
S1093: Phospho  
S134: Phospho  
S436: Phospho  
S915: Phospho; S916: Phospho  
S260: Phospho  
T1781: Phospho  
S5851: Phospho  
S5400: Phospho  
S503: Phospho  
T60: Phospho  
S203: Phospho  
S2120: Phospho  
S939: Phospho  
S67: Phospho  
S2037: Phospho  
S687: Phospho  
S701: Phospho  
S410: Phospho  
S303: Phospho  
S304: Phospho  
T310: Phospho  
S1937: Phospho  
S128: Phospho  
S47: Phospho; S51: Phospho  
S314: Phospho  
S1140: Phospho  
S557: Phospho  
T292: Phospho  
S500: Phospho  
S489: Phospho; S494: Phospho  
S632: Phospho  
S3505: Phospho  
S817: Phospho  
S75: Phospho  
S425: Phospho  
T261: Phospho  
S1308: Phospho  
S2105: Phospho  
S1249: Phospho  
S1241: Phospho  
S617: Phospho  
S306: Phospho  
S1704: Phospho  
S1225: Phospho  
S293: Phospho  
S72: Phospho  
S179: Phospho  
S614: Phospho  
S182: Phospho



SSGTNFQGLPSK  
LAVLSSSLTHWK  
EFDELNPSAQR  
LTPVSPESSTEK  
LSPSASPPR  
VSHSPPPK  
QSHSEPSLQSK  
QSHSEPSLQSK  
QSHSEPSLQSK  
QSHSGSISPYPK  
SLSGSSPCPK  
SPGMLEPLGSSR  
SPLAIR  
SPQRPGWSR  
SPSSPELNK  
SSSPVTELASR  
TPLISR  
TPLLPR  
TSPAPWK  
LNHVAAGLVSPSLK  
SNSPLPVPPSK  
SNSPLPVPPSK  
VTSGGVSESPSGFSK  
SPSPDDILER  
FSPPR  
SFADIGK  
SLTNSHLEK  
IGSDPLAYEPK  
SSLAETLDSTGSLDPQR  
ASPGTPLSPGSLR  
SLQQLAEER  
SLASIEAK  
SPIALPVK  
VPSTPPP  
VSGSFPEDSSK  
SLSTEVEPK  
TAPSSPLTSPSDTR  
EPTPVLGSGAAAAGR  
SPSELFAQHIVTIVHHVK  
SPSELFAQHIVTIVHHVK  
EPPSFVK  
QESDEESRPQNANYPR  
SGEGEVSGLMR  
FSLAR  
SPSPYYSR  
GFGSFR  
ALSLGTIPSLTR  
AADISLDNLVEGK  
EQYGLGYPYAVTPLTK  
QISFK  
GEALSALDSK  
ISLPLPNFSSLNLR

S2: Phospho  
S7: Phospho  
S8: Phospho  
S5: Phospho  
S4: Phospho; S6: Phospho  
S4: Phospho  
S2: Phospho  
S4: Phospho  
S8: Phospho  
S8: Phospho  
S5: Phospho  
S1: Phospho  
S1: Phospho  
S1: Phospho  
S1: Phospho  
T1: Phospho  
T1: Phospho  
S2: Phospho  
S10: Phospho  
S1: Phospho  
S3: Phospho  
S3: Phospho  
S3: Phospho  
S2: Phospho  
S1: Phospho  
S1: Phospho; S5: Phospho  
S3: Phospho  
S12: Phospho  
S11: Phospho  
S1: Phospho  
S4: Phospho  
S1: Phospho  
S3: Phospho  
S4: Phospho  
S3: Phospho  
S5: Phospho  
T3: Phospho  
S1: Phospho  
S3: Phospho  
S4: Phospho  
S3: Phospho  
S1: Phospho  
S2: Phospho  
S1: Phospho; S3: Phospho  
S4: Phospho  
S3: Phospho  
S5: Phospho  
T12: Phospho  
S3: Phospho  
S9: Phospho  
S10: Phospho  
S162: Phospho  
S98: Phospho  
S663: Phospho  
S272: Phospho  
S391: Phospho; S393: Phospho  
S638: Phospho  
S1079: Phospho  
S1081: Phospho  
S1085: Phospho  
S994: Phospho  
S782: Phospho  
S2132: Phospho  
S2046: Phospho  
S536: Phospho  
S1499: Phospho  
S1101: Phospho  
T1880: Phospho  
T2034: Phospho  
S1857: Phospho  
S207: Phospho  
S301: Phospho  
S303: Phospho  
S280: Phospho  
S580: Phospho  
S67: Phospho  
S233: Phospho  
S52: Phospho; S56: Phospho  
S703: Phospho  
S81: Phospho  
S43: Phospho  
S1217: Phospho  
S668: Phospho  
S211: Phospho  
S975: Phospho  
S131: Phospho  
S196: Phospho  
S266: Phospho  
T74: Phospho  
S622: Phospho  
S624: Phospho  
S3738: Phospho  
S710: Phospho  
S473: Phospho  
S24: Phospho  
S260: Phospho; S262: Phospho  
S770: Phospho  
S454: Phospho  
S1618: Phospho  
T1609: Phospho  
S184: Phospho  
S168: Phospho  
S420: Phospho

ISLPLPNFSSLNLR  
QVQSLTCEVDALK  
SLYASSPGGVYATR  
LNATASLEQER  
LSPPSLR  
TLTPPLR  
ASLEDAPVDDLTR  
SCTPSPDQISHR

S2: Phospho  
S4: Phospho  
S6: Phospho  
S6: Phospho  
S4: Phospho  
T3: Phospho  
S2: Phospho  
S5: Phospho

S412: Phospho  
S325: Phospho  
S56: Phospho  
S32: Phospho  
S209: Phospho  
T364: Phospho  
S284: Phospho  
S275: Phospho

| Peptide | Score  | FDR | Scan Type | Found in Other Scan? | Rep116/Rep114 | pval     | Rep116/Rep114 |
|---------|--------|-----|-----------|----------------------|---------------|----------|---------------|
| 25.23   | 0.0004 | HCD | No        |                      | 1.89          | 0.00E+00 |               |
| 53.27   | 0.0000 | HCD | Yes       |                      | 1.23          | 1.89E-03 |               |
| 23.9    | 0.0004 | HCD | No        |                      | 1.35          | 1.24E-06 |               |
| 56.25   | 0.0000 | HCD | No        |                      | 1.58          | 1.11E-15 |               |
| 103.95  | 0.0000 | HCD | Yes       |                      | 1.25          | 7.51E-03 |               |
| 94.3    | 0.0000 | HCD | Yes       |                      | 1.43          | 4.70E-02 |               |
| 37.01   | 0.0000 | HCD | Yes       |                      | 1.22          | 2.36E-02 |               |
| 34.28   | 0.0000 | HCD | No        |                      | 1.12          | 1.39E-02 |               |
| 32.23   | 0.0003 | HCD | Yes       |                      | 1.77          | 0.00E+00 |               |
| 38.93   | 0.0000 | CID | Yes       |                      | 1.27          | 5.08E-03 |               |
| 43.22   | 0.0000 | HCD | No        |                      | 1.30          | 1.36E-02 |               |
| 33.57   | 0.0000 | HCD | No        |                      | 1.25          | 1.90E-02 |               |
| 74.14   | 0.0000 | HCD | Yes       |                      | 1.27          | 4.67E-04 |               |
| 27.59   | 0.0003 | HCD | Yes       |                      | 1.30          | 2.28E-04 |               |
| 25.94   | 0.0003 | HCD | No        |                      | 1.36          | 2.97E-02 |               |
| 85.86   | 0.0000 | HCD | Yes       |                      | 1.25          | 8.37E-03 |               |
| 50.42   | 0.0000 | HCD | No        |                      | 1.40          | 4.36E-03 |               |
| 29.18   | 0.0003 | HCD | Yes       |                      | 1.32          | 1.71E-04 |               |
| 21.85   | 0.0003 | HCD | No        |                      | 1.42          | 6.48E-07 |               |
| 47.97   | 0.0000 | HCD | No        |                      | 1.41          | 6.91E-12 |               |
| 32.09   | 0.0003 | HCD | No        |                      | 1.22          | 2.74E-02 |               |
| 31.29   | 0.0000 | CID | No        |                      | 1.29          | 1.67E-02 |               |
| 49.37   | 0.0000 | CID | Yes       |                      | 1.60          | 6.25E-04 |               |
| 44.94   | 0.0000 | HCD | Yes       |                      | 1.34          | 1.10E-07 |               |
| 66.14   | 0.0000 | CID | No        |                      | 2.78          | 0.00E+00 |               |
| 34.08   | 0.0000 | CID | No        |                      | 3.84          | 8.24E-05 |               |
| 17.67   | 0.0004 | HCD | No        |                      | 1.44          | 4.07E-02 |               |
| 19.69   | 0.0004 | HCD | Yes       |                      | 2.36          | 2.94E-13 |               |
| 39.87   | 0.0000 | CID | Yes       |                      | 1.91          | 7.84E-14 |               |
| 65.77   | 0.0000 | HCD | Yes       |                      | 1.27          | 1.97E-04 |               |
| 24.59   | 0.0004 | HCD | Yes       |                      | 1.35          | 1.25E-04 |               |
| 17.26   | 0.0004 | HCD | No        |                      | 1.20          | 3.41E-02 |               |
| 22.36   | 0.0003 | HCD | Yes       |                      | 1.37          | 4.12E-04 |               |
| 31.36   | 0.0003 | HCD | No        |                      | 1.45          | 1.40E-04 |               |
| 18.42   | 0.0004 | HCD | Yes       |                      | 1.64          | 7.61E-04 |               |
| 58.82   | 0.0000 | HCD | No        |                      | 1.42          | 3.49E-03 |               |
| 67.79   | 0.0000 | HCD | Yes       |                      | 1.26          | 2.36E-02 |               |
| 45.22   | 0.0000 | HCD | No        |                      | 1.33          | 7.94E-05 |               |
| 83.44   | 0.0000 | HCD | Yes       |                      | 1.29          | 8.19E-03 |               |
| 15.71   | 0.0006 | HCD | No        |                      | 1.44          | 9.68E-03 |               |
| 44.06   | 0.0000 | HCD | No        |                      | 1.50          | 1.02E-08 |               |
| 19.17   | 0.0004 | HCD | Yes       |                      | 1.20          | 1.01E-02 |               |
| 23.98   | 0.0004 | HCD | Yes       |                      | 1.65          | 4.09E-02 |               |
| 52.82   | 0.0000 | CID | Yes       |                      | 1.36          | 2.70E-03 |               |
| 86.7    | 0.0000 | HCD | Yes       |                      | 1.39          | 8.77E-04 |               |
| 61.93   | 0.0000 | HCD | Yes       |                      | 1.41          | 2.60E-03 |               |
| 40.17   | 0.0000 | CID | Yes       |                      | 1.65          | 0.00E+00 |               |
| 28.23   | 0.0003 | HCD | Yes       |                      | 1.22          | 7.33E-03 |               |
| 39.94   | 0.0000 | HCD | No        |                      | 1.18          | 2.34E-02 |               |
| 44.26   | 0.0000 | HCD | No        |                      | 1.40          | 3.92E-04 |               |
| 28.23   | 0.0003 | HCD | No        |                      | 1.87          | 2.14E-03 |               |

|        |        |     |     |      |          |
|--------|--------|-----|-----|------|----------|
| 19.04  | 0.0004 | HCD | No  | 1.52 | 2.19E-02 |
| 15.42  | 0.0006 | HCD | No  | 1.45 | 2.17E-03 |
| 55.62  | 0.0000 | HCD | Yes | 1.14 | 1.42E-02 |
| 43.18  | 0.0000 | HCD | Yes | 1.31 | 9.78E-04 |
| 54.31  | 0.0000 | HCD | Yes | 1.32 | 1.21E-03 |
| 31.47  | 0.0003 | HCD | Yes | 1.41 | 3.26E-08 |
| 27.58  | 0.0003 | HCD | No  | 1.29 | 1.66E-02 |
| 47.67  | 0.0000 | HCD | Yes | 2.00 | 0.00E+00 |
| 29.57  | 0.0003 | HCD | No  | 1.77 | 1.17E-05 |
| 73.12  | 0.0000 | HCD | No  | 1.24 | 2.67E-02 |
| 46.98  | 0.0000 | HCD | Yes | 1.22 | 2.87E-05 |
| 35.04  | 0.0000 | HCD | No  | 1.22 | 4.91E-05 |
| 63.53  | 0.0000 | CID | Yes | 1.35 | 2.80E-04 |
| 60.5   | 0.0000 | HCD | Yes | 1.42 | 1.21E-03 |
| 56.55  | 0.0000 | HCD | Yes | 1.57 | 3.75E-11 |
| 50.04  | 0.0000 | HCD | Yes | 1.38 | 7.42E-03 |
| 27.84  | 0.0003 | HCD | Yes | 1.25 | 4.34E-02 |
| 43.77  | 0.0000 | HCD | No  | 1.23 | 5.21E-04 |
| 67.95  | 0.0000 | HCD | Yes | 1.22 | 4.81E-02 |
| 40.59  | 0.0000 | HCD | Yes | 1.30 | 4.17E-05 |
| 16.79  | 0.0060 | CID | No  | 1.36 | 3.60E-02 |
| 28.87  | 0.0003 | CID | No  | 1.29 | 4.21E-03 |
| 63.39  | 0.0000 | CID | Yes | 1.31 | 1.34E-02 |
| 54.33  | 0.0000 | HCD | No  | 1.41 | 1.43E-05 |
| 105.94 | 0.0000 | HCD | Yes | 1.51 | 1.18E-02 |
| 79.82  | 0.0000 | HCD | Yes | 1.66 | 1.27E-02 |
| 54.31  | 0.0000 | HCD | Yes | 1.44 | 3.77E-05 |
| 50.05  | 0.0000 | HCD | Yes | 1.53 | 9.71E-05 |
| 47.97  | 0.0000 | HCD | No  | 1.25 | 1.72E-03 |
| 22.67  | 0.0004 | HCD | No  | 1.34 | 2.35E-07 |
| 57.79  | 0.0000 | HCD | Yes | 2.28 | 0.00E+00 |
| 50.07  | 0.0000 | HCD | Yes | 1.32 | 2.32E-03 |
| 42.7   | 0.0000 | HCD | No  | 1.20 | 1.31E-02 |
| 39.06  | 0.0000 | HCD | No  | 1.60 | 2.74E-05 |
| 24.31  | 0.0004 | HCD | No  | 1.24 | 1.51E-02 |
| 23.83  | 0.0016 | CID | Yes | 1.55 | 4.98E-05 |
| 45.46  | 0.0000 | HCD | Yes | 1.12 | 4.99E-02 |
| 21.22  | 0.0003 | HCD | No  | 1.24 | 3.30E-02 |
| 75.18  | 0.0000 | HCD | Yes | 1.68 | 4.32E-02 |
| 84.84  | 0.0000 | CID | Yes | 1.55 | 1.28E-03 |
| 28.01  | 0.0003 | HCD | No  | 1.62 | 1.67E-03 |
| 29.05  | 0.0003 | HCD | No  | 1.33 | 2.25E-04 |
| 19.68  | 0.0004 | HCD | No  | 1.27 | 5.18E-03 |
| 36.33  | 0.0000 | HCD | Yes | 1.25 | 8.69E-03 |
| 28.31  | 0.0003 | CID | No  | 2.48 | 8.51E-03 |
| 38.06  | 0.0000 | HCD | No  | 2.13 | 0.00E+00 |
| 33.21  | 0.0000 | HCD | No  | 1.74 | 4.30E-07 |
| 47.68  | 0.0000 | HCD | Yes | 1.17 | 2.28E-02 |
| 45.63  | 0.0000 | CID | Yes | 1.55 | 3.11E-03 |
| 65.28  | 0.0000 | HCD | Yes | 1.45 | 9.67E-04 |
| 30.15  | 0.0003 | HCD | No  | 1.68 | 1.38E-06 |
| 40.34  | 0.0000 | HCD | Yes | 1.23 | 1.41E-02 |

|        |        |     |     |      |          |
|--------|--------|-----|-----|------|----------|
| 45.5   | 0.0000 | HCD | No  | 1.17 | 5.76E-03 |
| 30.49  | 0.0003 | HCD | Yes | 2.31 | 1.59E-02 |
| 29.48  | 0.0003 | HCD | Yes | 1.34 | 2.34E-03 |
| 19.09  | 0.0004 | HCD | No  | 1.29 | 1.63E-02 |
| 24.77  | 0.0004 | HCD | No  | 1.41 | 7.77E-03 |
| 36.29  | 0.0000 | HCD | Yes | 2.82 | 0.00E+00 |
| 19     | 0.0004 | HCD | Yes | 1.39 | 3.85E-02 |
| 12.5   | 0.0136 | CID | Yes | 1.81 | 1.51E-12 |
| 84.73  | 0.0000 | HCD | Yes | 1.27 | 3.47E-02 |
| 66.73  | 0.0000 | HCD | Yes | 1.33 | 1.24E-03 |
| 60.11  | 0.0000 | HCD | Yes | 1.70 | 2.59E-04 |
| 63.44  | 0.0000 | HCD | Yes | 2.20 | 1.67E-03 |
| 55.42  | 0.0000 | HCD | Yes | 2.62 | 7.26E-04 |
| 32.65  | 0.0002 | HCD | No  | 1.45 | 5.55E-03 |
| 56.55  | 0.0000 | HCD | Yes | 1.18 | 4.80E-03 |
| 24.33  | 0.0004 | HCD | Yes | 1.23 | 3.30E-02 |
| 41.63  | 0.0000 | HCD | No  | 1.11 | 4.03E-02 |
| 93.77  | 0.0000 | HCD | Yes | 2.19 | 1.39E-02 |
| 34.83  | 0.0000 | HCD | No  | 1.33 | 3.92E-04 |
| 45.88  | 0.0000 | HCD | No  | 1.37 | 2.73E-03 |
| 62.47  | 0.0000 | HCD | Yes | 1.30 | 1.18E-02 |
| 43.34  | 0.0000 | CID | No  | 1.85 | 2.80E-06 |
| 40.41  | 0.0000 | CID | No  | 1.50 | 4.13E-03 |
| 29.85  | 0.0000 | CID | No  | 1.67 | 3.99E-03 |
| 16.05  | 0.0005 | HCD | No  | 1.45 | 4.43E-03 |
| 78.48  | 0.0000 | HCD | No  | 1.43 | 5.26E-05 |
| 81.7   | 0.0000 | HCD | Yes | 1.69 | 7.12E-06 |
| 71.2   | 0.0000 | CID | No  | 1.34 | 1.41E-03 |
| 63.73  | 0.0000 | HCD | No  | 1.81 | 2.70E-05 |
| 69.07  | 0.0000 | HCD | No  | 1.23 | 4.05E-02 |
| 85     | 0.0000 | HCD | No  | 1.22 | 1.76E-03 |
| 38.95  | 0.0000 | CID | No  | 2.37 | 4.59E-07 |
| 24.83  | 0.0004 | HCD | No  | 1.73 | 8.25E-08 |
| 69.7   | 0.0000 | HCD | Yes | 1.27 | 3.44E-02 |
| 51.2   | 0.0000 | HCD | Yes | 1.30 | 4.92E-03 |
| 34.34  | 0.0000 | CID | No  | 1.55 | 4.79E-04 |
| 17.04  | 0.0056 | CID | No  | 1.25 | 1.94E-02 |
| 20.53  | 0.0003 | HCD | No  | 1.71 | 2.63E-05 |
| 11.46  | 0.0169 | CID | Yes | 1.55 | 1.45E-02 |
| 44.4   | 0.0000 | HCD | Yes | 1.42 | 2.60E-02 |
| 29.56  | 0.0003 | HCD | Yes | 1.16 | 2.59E-02 |
| 19.84  | 0.0023 | CID | No  | 1.39 | 2.36E-02 |
| 45.26  | 0.0000 | CID | No  | 1.43 | 4.61E-05 |
| 102.05 | 0.0000 | HCD | Yes | 1.65 | 4.06E-05 |
| 28.16  | 0.0003 | HCD | No  | 1.27 | 1.45E-02 |
| 32     | 0.0003 | HCD | Yes | 1.21 | 2.56E-02 |
| 51.97  | 0.0000 | CID | Yes | 1.25 | 8.68E-03 |
| 60.44  | 0.0000 | HCD | Yes | 2.39 | 0.00E+00 |
| 48.33  | 0.0000 | HCD | No  | 1.37 | 2.11E-04 |
| 61.54  | 0.0000 | HCD | No  | 1.87 | 6.58E-09 |
| 33.04  | 0.0002 | HCD | Yes | 1.32 | 6.04E-05 |
| 36.89  | 0.0000 | CID | Yes | 1.73 | 1.91E-02 |

|        |        |     |     |      |          |
|--------|--------|-----|-----|------|----------|
| 44.78  | 0.0000 | HCD | Yes | 1.69 | 5.50E-07 |
| 34.24  | 0.0000 | HCD | No  | 2.08 | 2.33E-10 |
| 63.13  | 0.0000 | HCD | Yes | 1.20 | 2.09E-02 |
| 69.85  | 0.0000 | CID | Yes | 1.38 | 1.02E-04 |
| 45.14  | 0.0000 | HCD | Yes | 1.15 | 1.41E-02 |
| 25.04  | 0.0007 | CID | Yes | 1.16 | 3.60E-02 |
| 70.18  | 0.0000 | CID | Yes | 1.66 | 1.13E-05 |
| 21.48  | 0.0003 | HCD | Yes | 1.25 | 6.41E-03 |
| 28.61  | 0.0003 | HCD | Yes | 1.72 | 8.06E-10 |
| 30.41  | 0.0003 | HCD | Yes | 2.01 | 0.00E+00 |
| 72.59  | 0.0000 | HCD | Yes | 1.21 | 2.58E-03 |
| 48.56  | 0.0000 | HCD | Yes | 1.54 | 9.31E-05 |
| 16.01  | 0.0072 | CID | No  | 1.22 | 4.34E-03 |
| 10.77  | 0.0011 | HCD | Yes | 1.32 | 1.18E-04 |
| 56.13  | 0.0000 | HCD | Yes | 1.31 | 1.39E-03 |
| 47.3   | 0.0000 | HCD | Yes | 1.33 | 3.05E-08 |
| 24.48  | 0.0004 | HCD | Yes | 1.15 | 1.12E-02 |
| 37.72  | 0.0000 | HCD | Yes | 1.36 | 7.96E-08 |
| 39.96  | 0.0000 | HCD | Yes | 1.47 | 4.59E-10 |
| 65.5   | 0.0000 | HCD | Yes | 1.34 | 7.97E-04 |
| 38.82  | 0.0000 | HCD | Yes | 1.23 | 7.72E-03 |
| 17.39  | 0.0004 | HCD | Yes | 1.93 | 4.36E-13 |
| 19.57  | 0.0028 | CID | No  | 1.16 | 4.53E-02 |
| 49.2   | 0.0000 | HCD | Yes | 1.65 | 3.83E-06 |
| 18.83  | 0.0036 | CID | Yes | 1.11 | 4.42E-02 |
| 50.61  | 0.0000 | HCD | Yes | 1.35 | 2.31E-07 |
| 49.43  | 0.0000 | HCD | No  | 1.40 | 1.75E-05 |
| 19.19  | 0.0031 | CID | Yes | 1.19 | 1.63E-02 |
| 67.6   | 0.0000 | CID | No  | 1.42 | 1.05E-02 |
| 107.28 | 0.0000 | HCD | Yes | 1.71 | 2.26E-14 |
| 51.01  | 0.0000 | HCD | Yes | 1.68 | 6.36E-11 |
| 47.6   | 0.0000 | HCD | No  | 1.16 | 4.97E-03 |
| 69.55  | 0.0000 | HCD | Yes | 1.94 | 0.00E+00 |
| 25.43  | 0.0004 | HCD | No  | 1.26 | 3.74E-02 |
| 53.61  | 0.0000 | HCD | No  | 1.34 | 5.04E-06 |
| 46.36  | 0.0000 | HCD | Yes | 1.40 | 2.11E-07 |
| 46.26  | 0.0000 | HCD | Yes | 1.29 | 1.65E-02 |
| 87.24  | 0.0000 | HCD | Yes | 3.22 | 0.00E+00 |
| 66.79  | 0.0000 | HCD | Yes | 1.56 | 4.92E-04 |
| 66.29  | 0.0000 | HCD | No  | 1.47 | 1.09E-02 |
| 19.87  | 0.0023 | CID | No  | 1.88 | 2.81E-09 |
| 34.44  | 0.0000 | HCD | No  | 1.74 | 2.10E-04 |
| 56.95  | 0.0000 | CID | Yes | 1.23 | 7.60E-03 |
| 29.66  | 0.0000 | CID | Yes | 1.95 | 0.00E+00 |
| 14.87  | 0.0086 | CID | Yes | 1.42 | 4.64E-03 |
| 21.35  | 0.0003 | HCD | No  | 1.13 | 4.33E-02 |
| 67.3   | 0.0000 | HCD | No  | 1.20 | 1.95E-02 |
| 40.03  | 0.0000 | HCD | Yes | 1.53 | 2.54E-04 |
| 32.08  | 0.0000 | CID | No  | 1.49 | 1.25E-02 |
| 23.6   | 0.0004 | HCD | No  | 1.13 | 9.12E-03 |
| 69.51  | 0.0000 | HCD | Yes | 1.46 | 3.67E-05 |
| 26.04  | 0.0008 | CID | No  | 1.64 | 2.74E-04 |

|       |        |     |     |      |          |
|-------|--------|-----|-----|------|----------|
| 22.24 | 0.0021 | CID | Yes | 2.97 | 3.11E-15 |
| 41.83 | 0.0000 | HCD | Yes | 1.48 | 4.20E-02 |
| 36.91 | 0.0000 | CID | Yes | 1.49 | 1.84E-04 |
| 93.32 | 0.0000 | HCD | No  | 1.40 | 3.13E-05 |
| 33.45 | 0.0000 | HCD | Yes | 1.25 | 9.82E-05 |
| 28.21 | 0.0003 | HCD | Yes | 1.23 | 1.87E-04 |
| 33.37 | 0.0000 | CID | No  | 1.51 | 8.56E-04 |
| 21.22 | 0.0003 | HCD | No  | 1.46 | 1.85E-05 |
